# Supplementary material for: Generation of hypoimmunogenic induced pluripotent stem cells by CRISPR-Cas9 system and detailed evaluation for clinical application
Source: PubMed Central journal article supplement (PMC9198376; doi:10.1016/j.omtm.2022.05.010), 2022-05-29
Supplement: mmc1.pdf [file mmc1.pdf]

**OMTM, Volume 26**

## **Supplemental information**

### **Generation of hypoimmunogenic induced pluripotent stem cells by CRISPR-Cas9 system and detailed evaluation for clinical application**

**Yuko Kitano, Sayaka Nishimura, Tomoaki M. Kato, Anna Ueda, Kaho Takigawa, Masafumi Umekage, Masaki Nomura, Ayane Kawakami, Haruna Ogawa, Huaigeng Xu, Akitsu Hotta, Naoko Takasu, and Masayoshi Tsukahara**

**A**

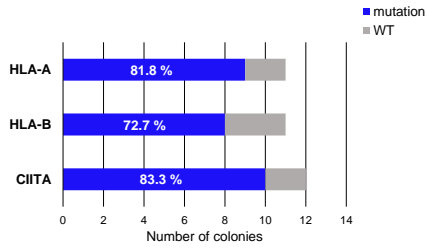

**B**

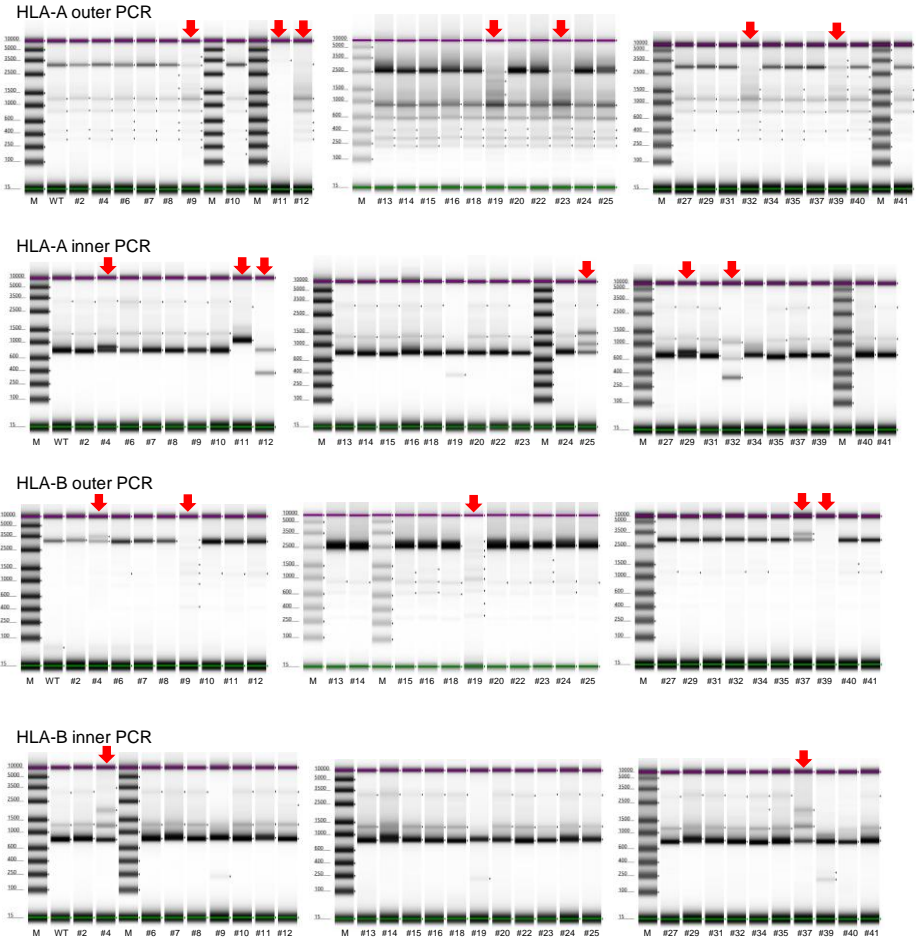

**C**

```

WT  CGTGCGGTTCGACAGCGACGCCGCGAGCCAGAGGATGGAGCCGCGGGCCCGTGGATAGAGCAGGAGGGGCCGGAGTATTGGGACGAGGAGACAGGGAAA
#19 CGTGCGGTTCGACAGCGACGCCGCGAGCCAGAGGATGGAGCCGCGGGCCCGTGGATAGAGCAGGAGGGGCCGGAGTATTGGGACGAGGAGACAGGGAAA
    * * * * * * * * * * * * * * * * * * * * * * * * * * * * * * * * * * * * * * * * * * * * * * *
    GTGAAGGCCCACTCACAGACTGACCGAGAGA-GAACCTGCGGGATCGCGCTCCGCTACTACAACCAGAGCGAGCCGGTGTAGTGACCCCGGCCCGGGCGCAG
    GTGAAGGCCCACTCACAGACTGACCGAGAGAAGAACCTGCGGATCGCGCTCCGCTACTACAACCAGAGCGAGCCGGTGTAGTGACCCCGGCCCGGGCGCAG
    * * * * * * * * * * * * * * * * * * * * * * * * * * * * * * * * * * * * * * * * * * * * * * *
    GTCACGAC---CCCTCATCCCCACGGACGGGCCGGGTCGCCACAGTCTCCGGTCCGAGATCCACCCGAAGCCGCGGGACCCCGGAGACCCCTTGCCC
    GTCACGACTCCCCATCCCCACGTACGGCCCGGCTCGCCCGAGTCTCCGGTCCGAGATCCGCTCCCTGAGGCCCGGGAGCCCGCCAGACCCCTCGAC
    * * * * * * * * * * * * * * * * * * * * * * * * * * * * * * * * * * * * * * * * * * * * * * *
    CGGGAGAGGCCCAAGCGCCTTAAACCCGGTTTCATTTTTCAGTTTAGGCCAAAATCCCCCGGGTTGGTCCGGGCCGGCGGGGCTCGGGGACATGGGCTG
    CGGCAGAGCCCAAGGCGGTTTACCGGTTTCATTTTTCAGTTTAGGCCAAAATCCCCCGGGTTGGTCCGGGCCGGCGGGGCTCGGGGACATGGGCTG
    
```

D

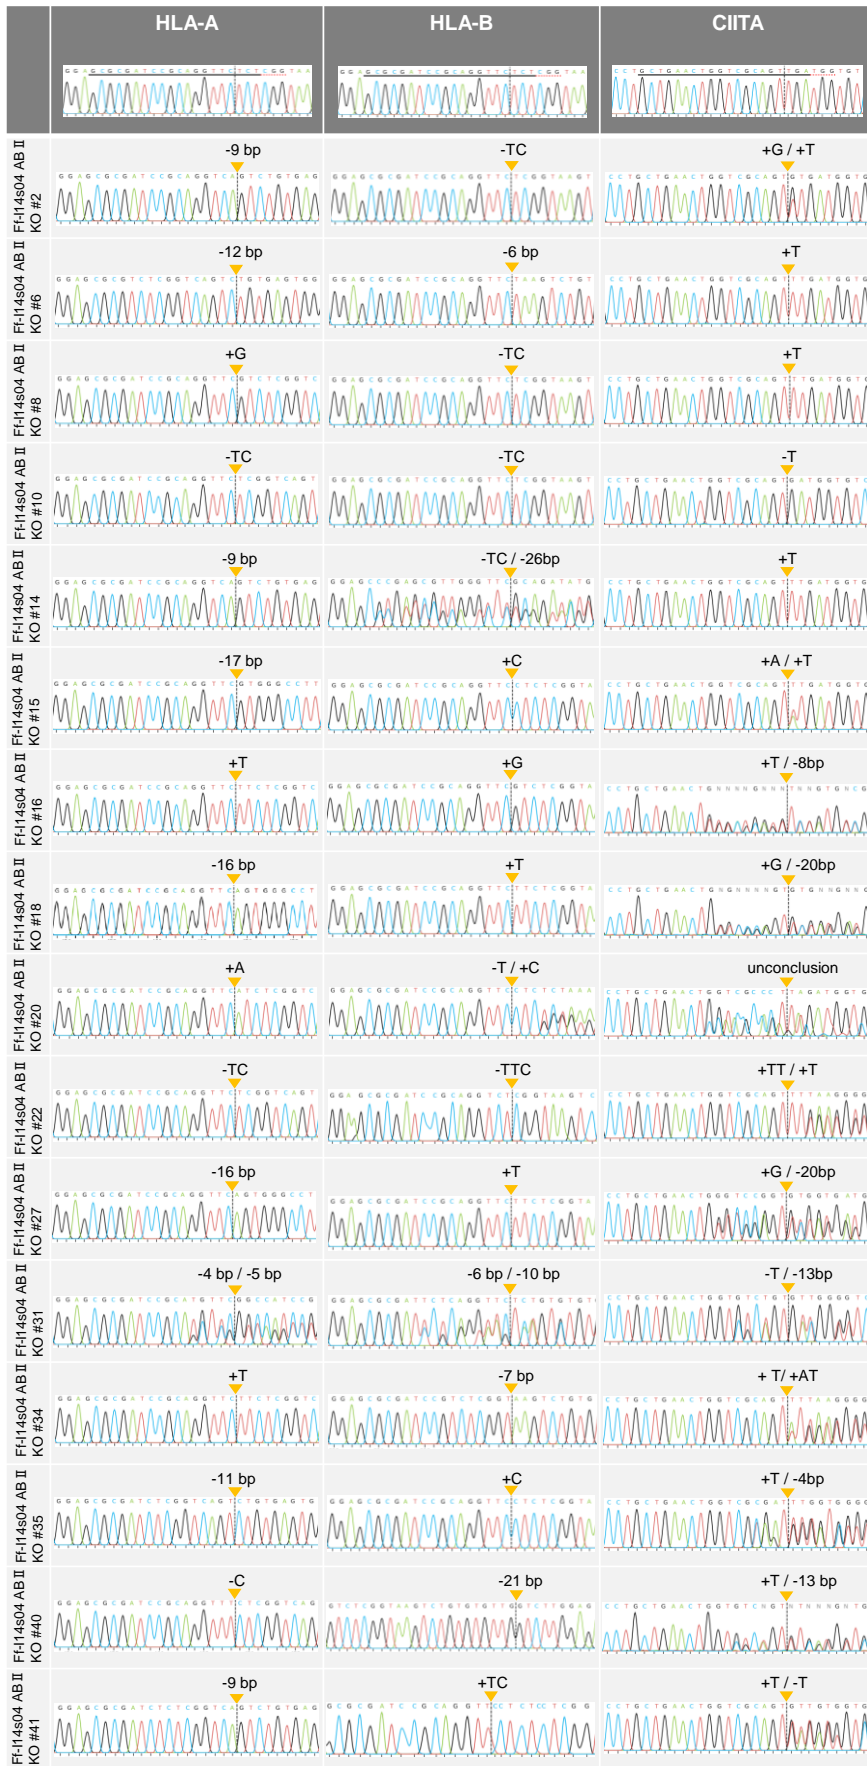

**Figure S1. Analysis of the target site of HLA-A/HLA-B/CIITA genome-edited iPSCs.**

- A) Histogram showing the frequency of WT and mutation sequences in the bulk cell population transformed with each sgRNA construct. The horizontal axis indicates the number of colonies sequenced.
- B) Automated electrophoresis of PCR amplified products using HLA-A outer/inner and HLA-B outer/inner specific PCR primer sets. Lanes #1-41 were examined genome-edited iPSC clones. Lane M, 10kb DNA size marker. Red arrows show the clones that were different size from WT or for which PCR products were not obtained.
- C) Sequence alignment of Sanger reads of HLA-A from origin (WT) and Ff-I14s04 ABII KO #19. cyan: HLA-A sequence, green: PAM, black: HLA-A/HLA-B common sequence, yellow: HLA-B sequence.
- D) Electropherograms of Sanger sequences at the target sites in genome-edited iPSC clones.

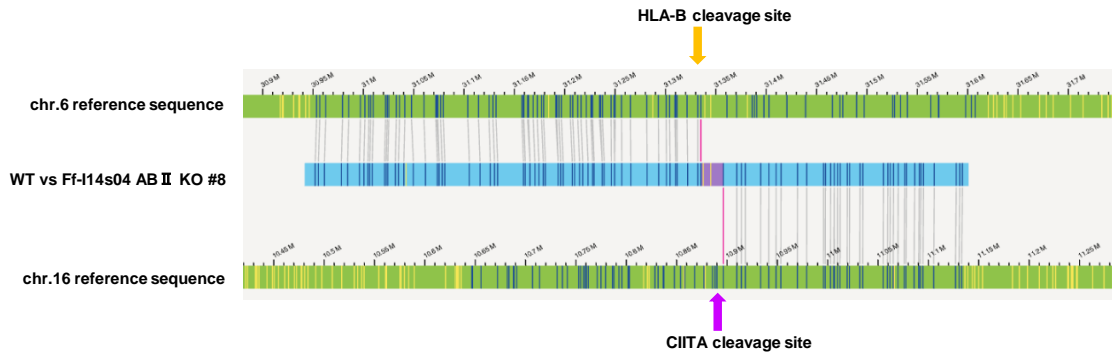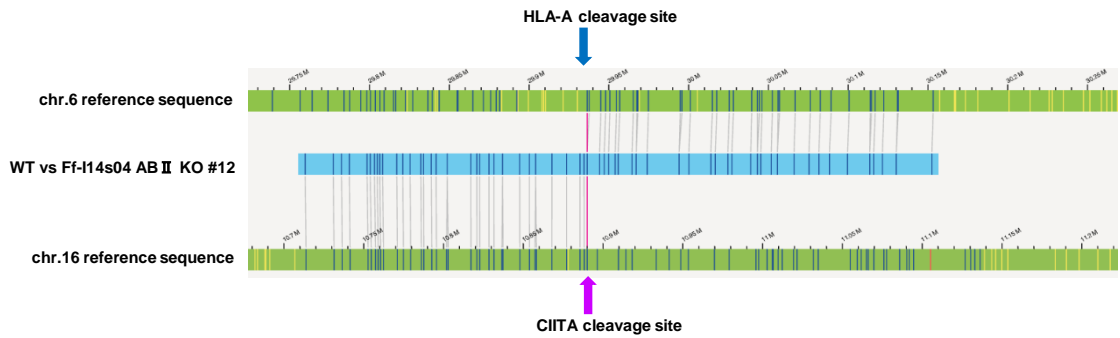

**Figure S2. Complicated genome sequence shown by whole genome analysis.**

The chromosomal translocations between HLA-A or HLA-B and CIITA cleavage site observed in optical genome mapping.

The genomic coordinate is hg38.

A

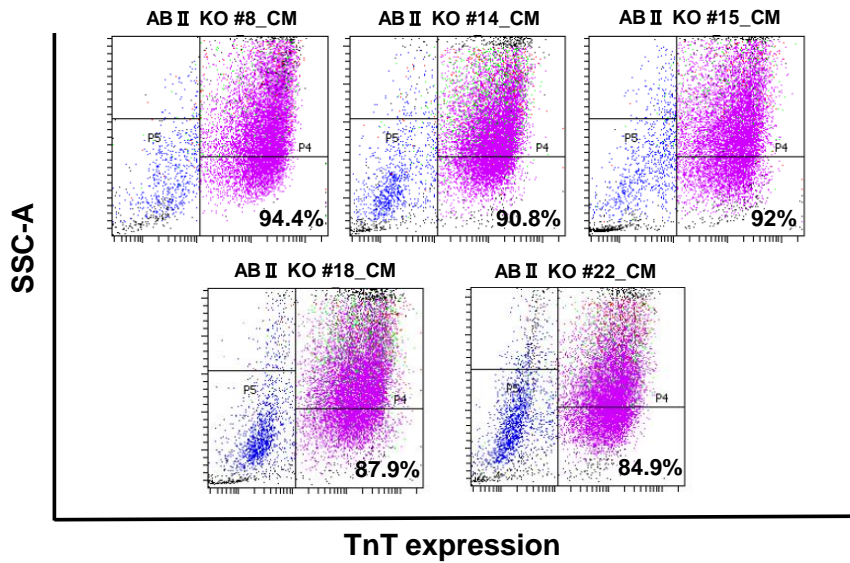

B

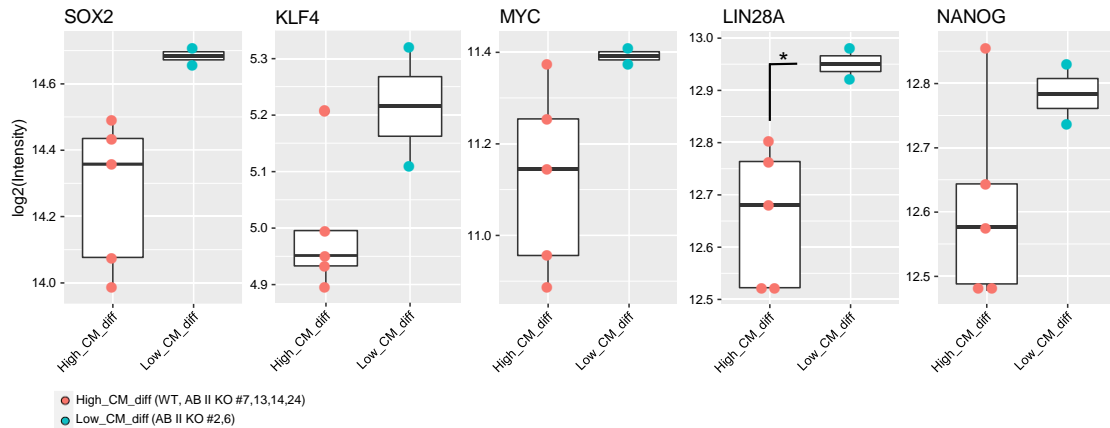

**Figure S3. Evaluation of the cardiomyocyte differentiation potential of cells derived from genome-edited iPSCs.**

- A) Scatter plots of results of the FCM analysis examining the proportion of troponin T (TnT)<sup>+</sup> cells after the induction of differentiation. The horizontal axis indicates the fluorescence intensity of fluorophores conjugated with the TnT antibody. The vertical axis indicates side scatter.
- B) Boxplot of microarray data showing the expressions levels of pluripotent marker genes in iPSC clones showing high (orange) or low (cyan) cardiomyocyte differentiation potential. Each dot shows the clones. Asterisk indicates statistical significance: \*  $p < 0.05$ .

A

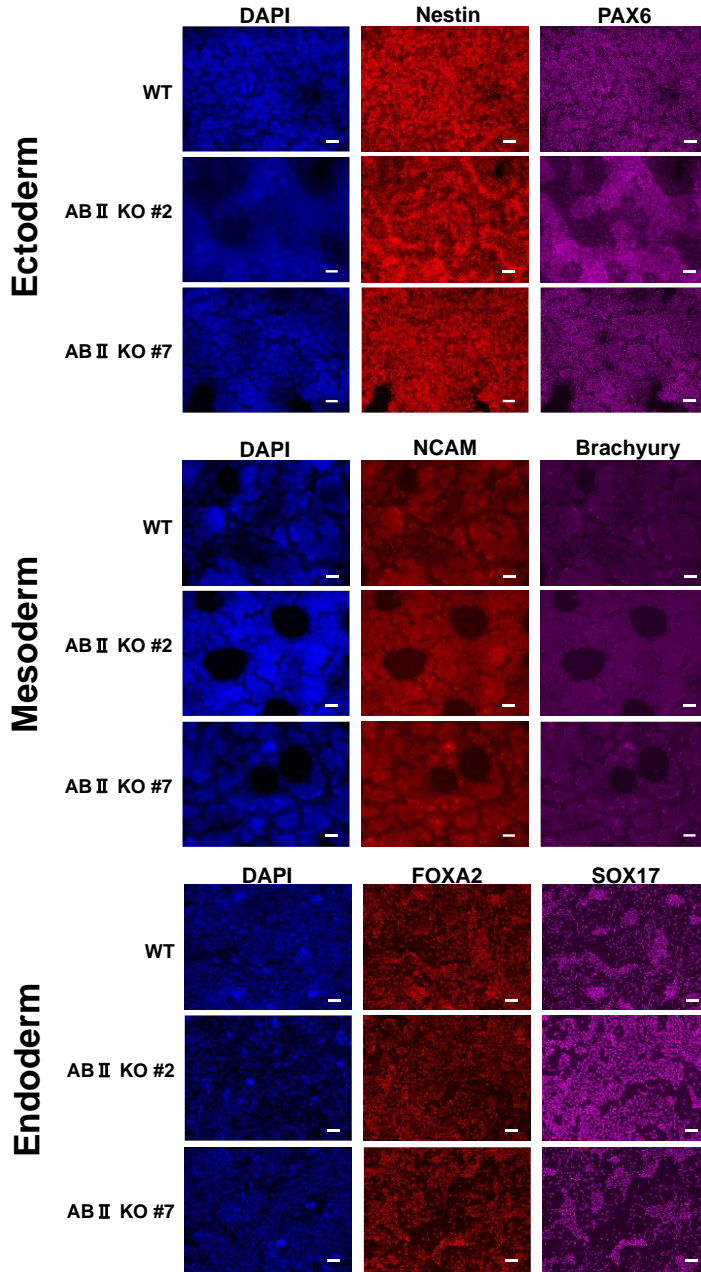

B

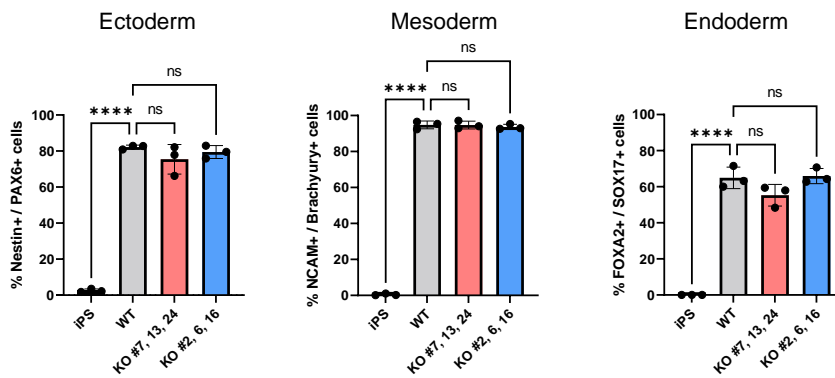

**Figure S4. Capacity of differentiation into three germ layers.**

- A) Immunofluorescence micrographs of differentiation into three germ layers. Ectodermal differentiated cells were stained using Nestin and PAX6 antibodies (top). Mesodermal differentiated cells were stained using NCAM and Brachyury antibodies (middle). Endodermal differentiated cells were stained using FOXA2 and SOX17 antibodies (bottom). All cells were stained by DAPI for nuclear staining. Scale bar, 100  $\mu\text{m}$ .
- B) Quantification of three germ layer marker-positive cells by flow cytometry. ns, not significant. Asterisks indicate statistical significance: \*\*\*\*  $p < 0.0001$ .



A

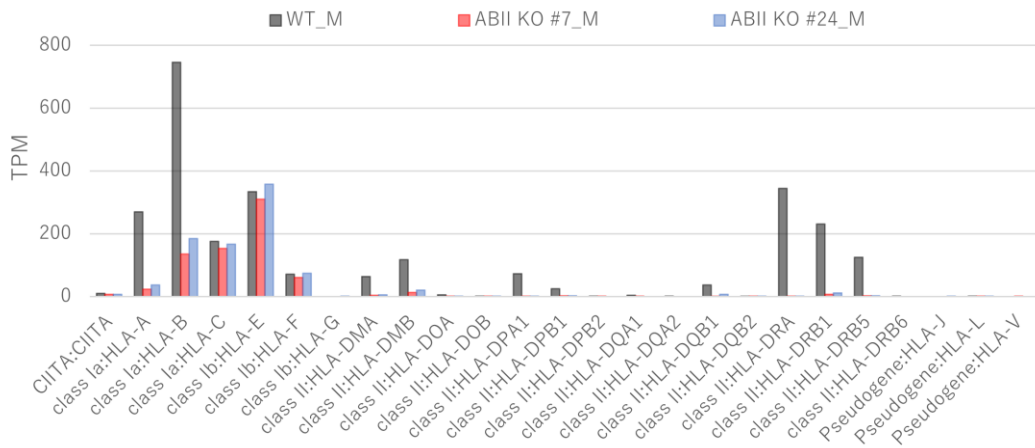

B

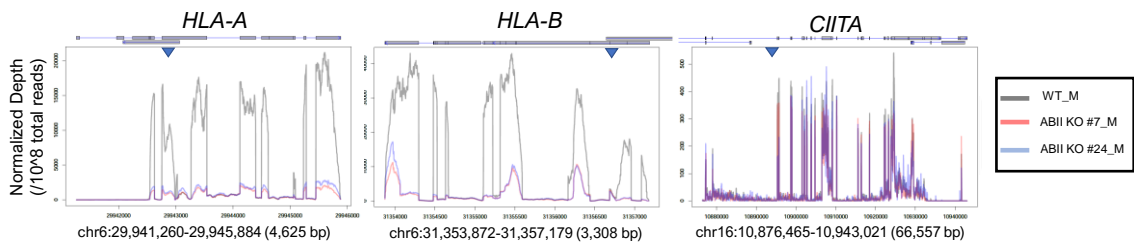

C

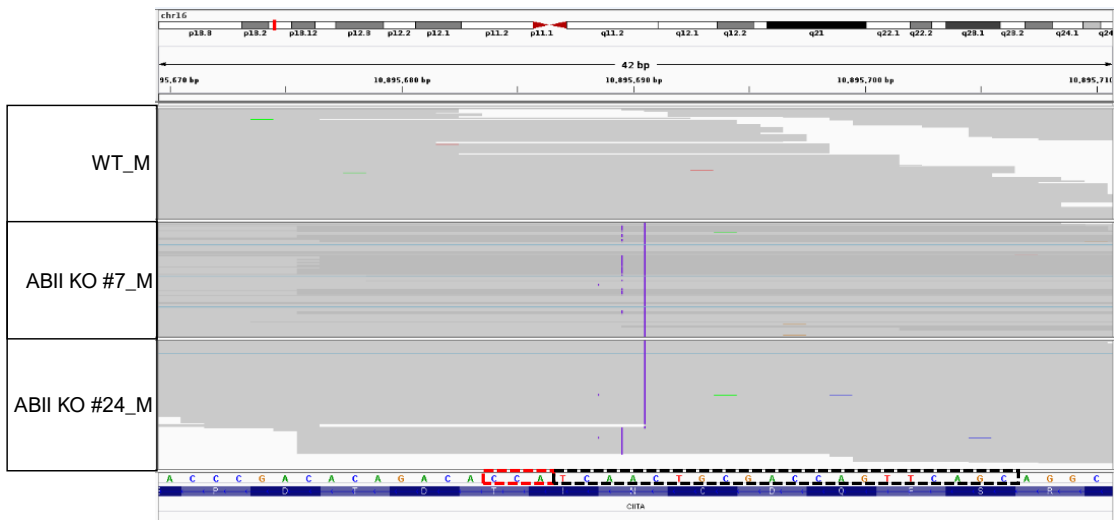

**Figure S5. The mRNA expression of HLA-related genes in differentiated CD14+ monocytes derived from genome-edited iPSCs.**

- Transcripts per million (TPM) values showing the normalized gene expression of the HLA-related genes in CD14+ monocytes derived from genome-edited iPSC clones. CD14+ monocytes derived from WT and genome-edited #7 and #24 iPSCs are colored black, red and blue, respectively.
- Diagram showing the normalized depth of the HLA-A, HLA-B and CIITA loci in differentiated monocytes derived from control and genome-edited iPSC clones (#7 and #24).
- Integrated genome viewer (IGV) image showing the insertion of the base (purple vertical lines) in the sequence reads in ABII KO #7\_M and ABII KO #24\_M, which was not found in WT\_M.

A

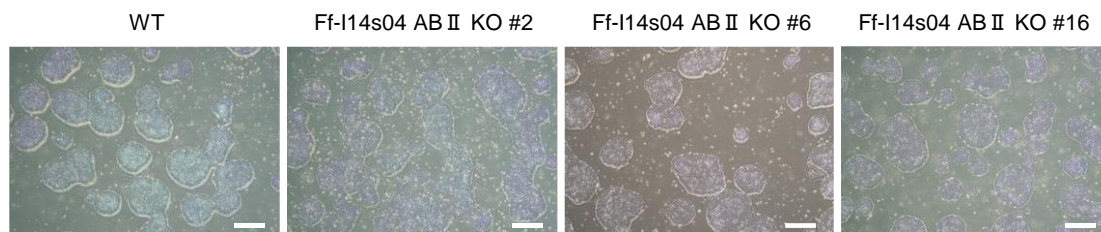

B

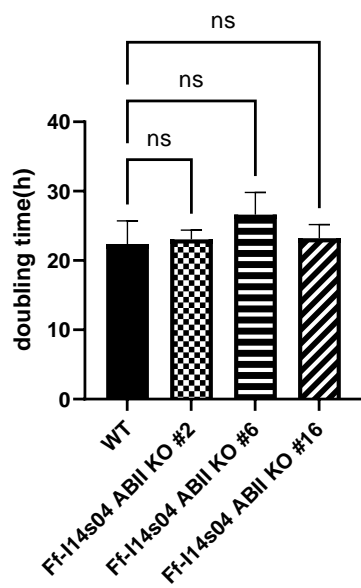

**Figure S6. Differences in cell characteristics before and after genome editing.**

- A) Morphology of wild-type iPSC and HLA-A/B/CIITA genome-edited iPSC clones. Scale bar, 200  $\mu$ m.
- B) Barplot showing the doubling time of wild-type iPSC and genome-edited iPSC clones #2, #6 and #16. Three biological replicates were performed. ns, not significant.

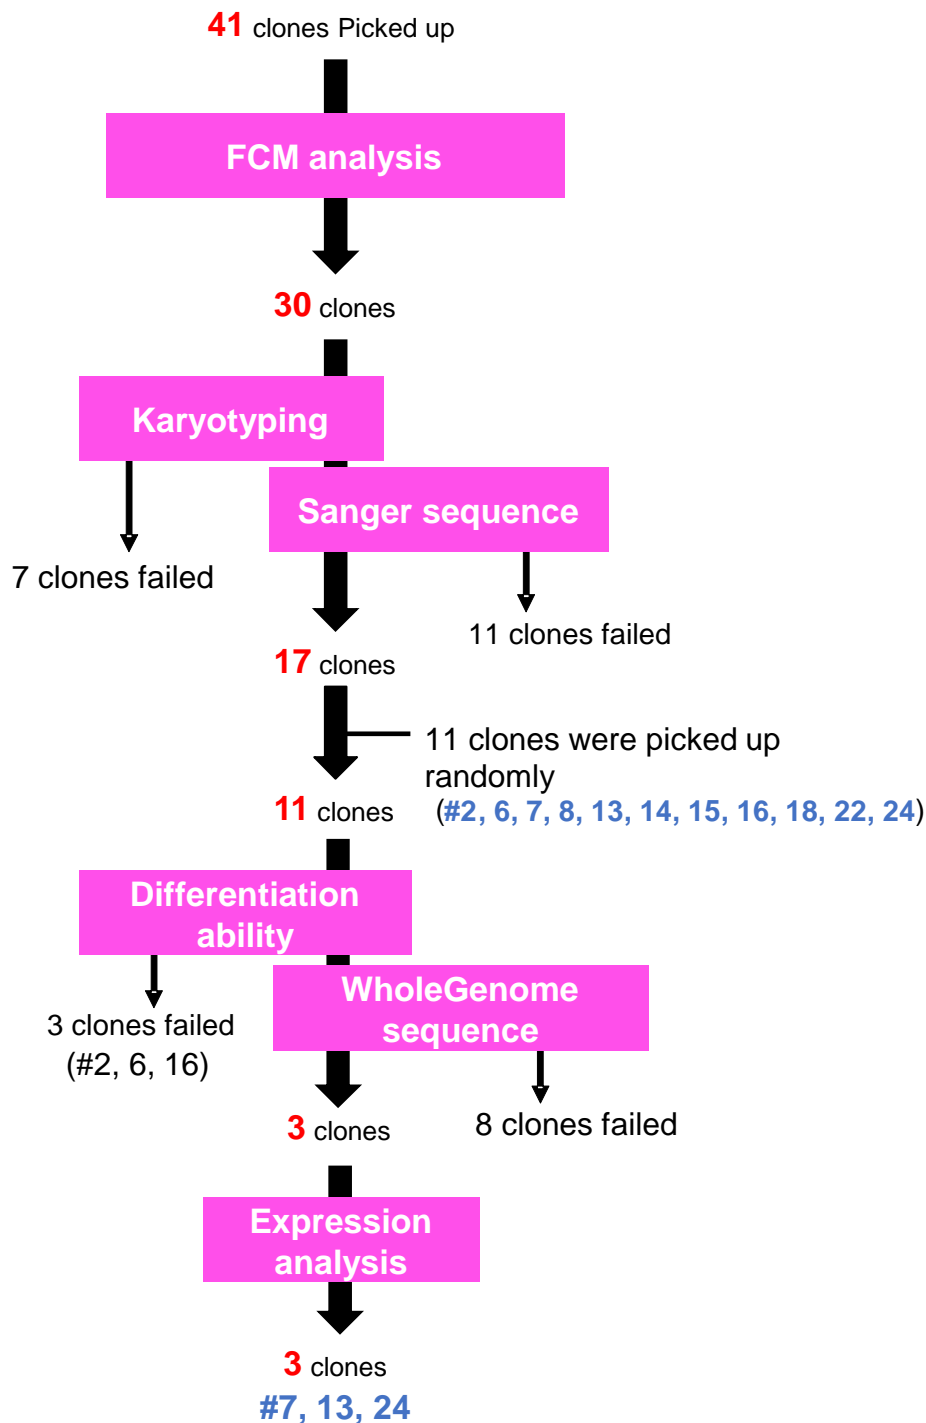

**Figure S7. Summary of genome-edited iPSC clones selection.**

We selected 30 clones with HLA-A<sup>(-)</sup>/HLA-C<sup>(+)</sup> by FCM. We then examined the karyotype to assess genomic integrity and conducted Sanger sequencing to confirm the In/del pattern in the target regions. Thirteen clones failed this screening. Eleven clones were randomly selected for whole genome sequencing and a differentiation test. Three clones passed these tests. Finally, we assessed the gene expression level and obtained three genome-edited iPSC clones.

**Table S1. HLA-A/B editable single guideRNA design.**

Target gene : HLA-A and HLA-B

Target exon : exon2 or 3

PAM : NGG

Design tool : CRISPOR 4.99

| Frequency ranking in Japanese population | Code of HLA-homozygous donors | HLA haplotype      | Target exon | Sequences(5'-3')                                                                             |
|------------------------------------------|-------------------------------|--------------------|-------------|----------------------------------------------------------------------------------------------|
| 1                                        | QHJI                          | A*24:02<br>B*52:01 | Exon 2      | AGAGAACCTGCGGATCGCGC                                                                         |
| 2                                        | RWMH                          | A*33:03<br>B*44:03 | Exon 3      | CAGGACCGCCTACGACGGCA                                                                         |
| 3                                        | DRXT                          | A*24:02<br>B*07:02 | Exon2       | CCGTGTCCCGGCCCGGCCGC<br>GGGCTCCCCGCGGCCGGGCC<br>GCGGGCGCCGTGGATAGAGC<br>GGCCCCTCCTGCTCTATCCA |
| 4                                        | RJWI                          | A*24:02<br>B*54:01 | Exon2       | CGATGAAGCGGGGCTCCCCG                                                                         |

**Table S2. Mutation patterns of target site-cloning and sequencing.**

| HLA-A                         | HLA-B                      | CIITA                                             |
|-------------------------------|----------------------------|---------------------------------------------------|
| del(deletion)-GA-re(reverse)  | del-GAGAGAACC-for(forward) | del 100bp<-for                                    |
| WT                            | ins-TCCTGCGACTTACCGC-for   | del-CCTCCCAGAACCCGACACAGACACCATCAACTGCGACCAGT-for |
| del-CGAGA-re                  | WT                         | WT                                                |
| del-CGAGA-re                  | del-GAACCTGC-rev           | ins-A-for                                         |
| del-GAGAGAACC-re              | del-GA-for                 | del-CCATCAAC-rev                                  |
| unclear                       | del-GA-rev                 | unclear                                           |
| del-GAGAGAACC-re              | WT                         | ins-A-rev                                         |
| del-ACCTGCGGATCGCGCTCCGCTA-re | del-GAACCTGC-for           | ins-A-for                                         |
| ins(insertion)-A-re           | WT                         | del-TGCGAC-rev                                    |
| del-ACCTGCGGATCGCGCTCCGCTA-re | del-GAGAGAACC-rev          | del-TCAACTGCGACCA-for                             |
| WT                            | del-AGAACCTG-rev           | WT                                                |
|                               |                            | ins-AA-rev                                        |

**Table S3. Amino acid predictions of the genome-edited iPSC clones.**

| Ff-I14s04<br>ABII KO | HLA-A                                              |                                           | HLA-B                                        |                                         | CIITA                                   |                                          |
|----------------------|----------------------------------------------------|-------------------------------------------|----------------------------------------------|-----------------------------------------|-----------------------------------------|------------------------------------------|
|                      | Allele1                                            | Allele2                                   | Allele1                                      | Allele2                                 | Allele1                                 | Allele2                                  |
| #2                   | c.296_304del<br>p. Arg99_Asn101del                 |                                           | c.300_301delGA<br>p. Asn101Profs*37 Exon3    |                                         | c.220_221insA<br>p. Asn74Lysfs*11 Exon3 | c.220_221insC<br>p. Asn74Thrfs*11 Exon3  |
| #6                   | c.300_311del<br>p. Glu100Asp / p. Asn101_Ile104del |                                           | c.294_299del<br>p. Try98* Exon2              |                                         | c.220_221insA<br>p. Asn74Lysfs*11 Exon3 |                                          |
| #7                   | c.299_300insA<br>p. Asn101Glufs*120 Exon4          | c.299delA<br>p. Glu100Glyfs*22 Exone2     | c.299_300insT<br>p. Glu100Aspfs*39 Exon3     | c.300_306del<br>p. Glu100Aspfs*49 Exon3 | c.220_221insA<br>p. Asn74Lysfs*11 Exon3 |                                          |
| #8                   | c.299_300insC<br>p. Glu100Aspfs*121 Exon4          |                                           | c.300_301delGA<br>p. Asn101Profs*37 Exon3    |                                         | c.220_221insA<br>p. Asn74Lysfs*11 Exon3 |                                          |
| #13                  | c.299_300insA<br>p. Asn101Glufs*120 Exon4          |                                           | c.299_300insA<br>p. Asn101Glufs*38 Exon3     |                                         | c.220_221insA<br>p. Asn74Lysfs*11 Exon3 |                                          |
| #14                  | c.296_304del<br>p. Arg99_Asn101del                 |                                           | c.300_301delGA<br>p. Asn101Profs*37 Exon3    | c.289_314del<br>p. Thr97Alafs*33 Exon3  | c.220_221insA<br>p. Asn74Lysfs*11 Exon3 |                                          |
| #15                  | c.283_299del<br>p. Ser95Glufs*120 Exon4            |                                           | c.299_300insG<br>p. Asn101Glufs*38 Exon3     |                                         | c.220_221insA<br>p. Asn74Lysfs*11 Exon3 | c.220_221insT<br>p. Asn74Ilefs*11 Exon3  |
| #16                  | c.299_300insA<br>p. Asn101Glufs*120 Exon4          |                                           | c.299_300insC<br>p. Glu100Aspfs*39 Exon3     |                                         | c.220_221insA<br>p. Asn74Lysfs*11 Exon3 | c.221_228del<br>p. Asn74Thrfs*8 Exon3    |
| #18                  | c.284_299del<br>p. Ser95* Exon2                    |                                           | c.299_300insA<br>p. Asn101Glufs*38 Exon3     |                                         | c.220_221insC<br>p. Asn74Thrfs*11 Exon3 | c.212_231del<br>p. Asp71Valfs*7 Exon3    |
| #22                  | c.300_301delGA<br>p. Asn101Profs*119 Exon4         |                                           | c.300_302delGAA<br>p. Glu100* / p. Asn101Asp |                                         | c.220_221insA<br>p. Asn74Lysfs*11 Exon3 | c.220_221insAA<br>p. Asn74Lysfs*42 Exon4 |
| #24                  | c.300delG<br>p. Asn101Thrfs*21 Exon2               | c.300_310del<br>p. Glu100Aspfs*117 Exone4 | c.299_300insA<br>p. Asn101Glufs*38 Exon3     | c.300_307del<br>p. Asn101Aspfs*35 Exon3 | c.220_221insA<br>p. Asn74Lysfs*11 Exon3 |                                          |

**Table S4. De novo CNV mutation in genome edited cells.**

| ABII_KO_2 | ABII_KO_6 | ABII_KO_7 | ABII_KO_8 | ABII_KO_13 | ABII_KO_14 | ABII_KO_15 | ABII_KO_16 | ABII_KO_18 | ABII_KO_22 | ABII_KO_24 | Locus                        | Size(bp) | Overlap_Gene                                                                                                                                                                                                                                                                                                                                                                                                            | Census (v88)  | Off-target |
|-----------|-----------|-----------|-----------|------------|------------|------------|------------|------------|------------|------------|------------------------------|----------|-------------------------------------------------------------------------------------------------------------------------------------------------------------------------------------------------------------------------------------------------------------------------------------------------------------------------------------------------------------------------------------------------------------------------|---------------|------------|
| X         |           |           |           |            |            |            |            |            |            |            | chr3:128,339,436-128,341,007 | 1572     | RPN1                                                                                                                                                                                                                                                                                                                                                                                                                    | RPN1          | CIITA      |
|           |           |           |           |            |            |            |            |            |            | X          | chr4:145,837,936-145,841,174 | 3239     | -                                                                                                                                                                                                                                                                                                                                                                                                                       | -             |            |
| X         | X         |           |           |            |            |            | X          |            |            |            | chr6:29,911,740-31,327,897   | 1416158  | HLA-A,HCG9,ZNRD1-AS1,HLA-J,HCG8,ZNRD1,PPP1R11,RNF39, TRIM31,TRIM31-AS1,TRIM40,TRIM10,TRIM15,TRIM26,HCG17, HLA-L,MIR6891,HCG18,TRIM39,TRIM39-RPP21,RPP21,HLA-E, GNL1,PRR3,ABCF1,MIR877,PPP1R10,MRPS18B,ATAT1,C6orf136, DHX16,PPP1R18,NRM,MDC1,MDC1-AS1,TUBB,FLOT1,IER3,LINC00243, DDR1,MIR4640,GTF2H4,VAR2,SFTA2,DPCR1,MUC21,MUC22,HCG22, C6orf15,PSORS1C1,CDSN,PSORS1C2,CCHCR1,TCF19,POU5F1,PSORS1C3, HCG27,HLA-C,HLA-B | HLA-A, POU5F1 |            |
|           |           |           |           |            |            |            |            | X          |            |            | chr9:71,733,413-71,752,214   | 18802    | TJP2                                                                                                                                                                                                                                                                                                                                                                                                                    | -             |            |
|           |           |           |           |            |            |            |            | X          |            |            | chr9:104,715,123-104,726,036 | 10914    | -                                                                                                                                                                                                                                                                                                                                                                                                                       | -             |            |
|           |           |           |           |            |            |            |            | X          |            |            | chr9:105,545,015-105,566,729 | 21715    | -                                                                                                                                                                                                                                                                                                                                                                                                                       | -             |            |
|           |           |           |           |            |            |            |            | X          |            |            | chr9:138,918,206-138,937,605 | 19400    | NACC2                                                                                                                                                                                                                                                                                                                                                                                                                   | -             |            |
|           |           |           |           |            |            |            |            | X          |            |            | chr9:140,975,937-140,988,910 | 12974    | CACNA1B                                                                                                                                                                                                                                                                                                                                                                                                                 | -             |            |
|           |           |           |           |            |            |            |            |            |            | X          | chr16:10,988,440-10,989,661  | 1222     | CIITA                                                                                                                                                                                                                                                                                                                                                                                                                   | CIITA         |            |
|           |           |           |           |            |            |            | X          |            |            |            | chr17:44,442,296-44,629,670  | 187375   | NSFP1,ARL17A,LRR37A2                                                                                                                                                                                                                                                                                                                                                                                                    | -             |            |
|           | X         |           |           |            |            |            |            |            |            |            | chr19:5,819,865-5,862,124    | 42260    | NR1H3,FUT6,FUT3,LOC101928844                                                                                                                                                                                                                                                                                                                                                                                            | -             |            |
|           |           |           |           |            | X          |            |            |            |            |            | chr21:25,118,166-25,121,850  | 3685     | -                                                                                                                                                                                                                                                                                                                                                                                                                       | -             |            |

**Table S5. De novo SNV mutation in genome edited cells.**

| ABII_KO_2 | ABII_KO_6 | ABII_KO_7 | ABII_KO_8 | ABII_KO_13 | ABII_KO_14 | ABII_KO_15 | ABII_KO_16 | ABII_KO_18 | ABII_KO_22 | ABII_KO_24 | Chr   | Start       | End         | Ref         | Alt | Func.ref Gene | Gene.ref Gene | ExonicFunc .ref Gene      |
|-----------|-----------|-----------|-----------|------------|------------|------------|------------|------------|------------|------------|-------|-------------|-------------|-------------|-----|---------------|---------------|---------------------------|
| X         | X         | X         | X         | X          | X          | X          | X          |            | X          | X          | chr16 | 10,989,545  | 10,989,545  | -           | A   | exonic        | CIITA         | fs <sup>a</sup> insertion |
| X         |           |           |           |            |            |            |            | X          |            |            | chr16 | 10,989,546  | 10,989,546  | -           | C   | exonic        | CIITA         | fs insertion              |
| X         |           |           |           |            |            |            |            |            |            |            | chr1  | 24,676,608  | 24,676,608  | C           | G   | exonic        | GRHL3         | ns <sup>b</sup> SNV       |
| X         |           |           |           |            |            |            |            |            |            |            | chr9  | 19,290,830  | 19,290,830  | C           | A   | exonic        | DENND4C       | ns SNV                    |
| X         |           |           |           |            | X          |            |            |            |            |            | chr6  | 29,910,752  | 29,910,760  | GACCGAGTG   | -   | exonic        | HLA-A         | non fs deletion           |
|           | X         |           |           |            |            |            |            |            |            |            | chr1  | 143,767,518 | 143,767,518 | G           | T   | exonic        | PPIAL4G       | ns SNV                    |
|           | X         |           |           |            |            |            |            |            |            |            | chr6  | 28,541,552  | 28,541,552  | G           | T   | exonic        | ZBED9         | ns SNV                    |
|           | X         |           |           |            |            |            |            |            | X          |            | chr6  | 29,910,758  | 29,910,768  | GTGGACCTGGG | -   | exonic        | HLA-A         | fs deletion               |
|           |           | X         |           |            |            |            |            |            |            |            | chr12 | 32,949,161  | 32,949,161  | T           | A   | exonic        | PKP2          | ns SNV                    |
|           |           | X         | X         | X          |            |            | X          |            |            |            | chr6  | 29,910,758  | 29,910,758  | -           | A   | exonic        | HLA-A         | fs insertion              |
|           |           | X         |           |            |            |            |            |            |            |            | chr6  | 31,324,502  | 31,324,508  | CAGGCTC     | -   | exonic        | HLA-B         | fs deletion               |
|           |           |           |           |            | X          |            |            |            |            |            | chr8  | 101,178,090 | 101,178,090 | G           | T   | exonic        | SPAG1         | ns SNV                    |
|           |           |           |           |            | X          |            |            |            |            |            | chr15 | 72,063,533  | 72,063,533  | G           | A   | exonic        | THSD4         | ns SNV                    |
|           |           |           |           |            | X          |            |            |            |            |            | chr18 | 29,264,323  | 29,264,325  | AGA         | -   | exonic        | B4GALT6       | non fs deletion           |
|           |           |           |           |            | X          |            |            |            |            |            | chr6  | 31,324,506  | 31,324,507  | CT          | -   | exonic        | HLA-B         | fs deletion               |
|           |           |           |           |            |            | X          |            |            |            |            | chr12 | 278,268     | 278,268     | A           | T   | exonic        | IQSEC3        | ns SNV                    |
|           |           |           |           |            |            | X          |            |            |            |            | chr16 | 10,989,546  | 10,989,546  | -           | T   | exonic        | CIITA         | fs insertion              |
|           |           |           |           |            |            | X          |            |            |            |            | chr19 | 39,200,939  | 39,200,939  | C           | T   | exonic        | ACTN4         | ns SNV                    |
|           |           |           |           |            |            |            | X          |            |            |            | chr12 | 120,762,766 | 120,762,766 | G           | A   | exonic        | PLA2G1B       | ns SNV                    |
|           |           |           |           |            |            |            | X          |            |            |            | chr16 | 10,989,548  | 10,989,555  | CTGCGACC    | -   | exonic        | CIITA         | fs deletion               |
|           |           |           |           |            |            |            |            | X          |            |            | chr2  | 172,966,269 | 172,966,269 | C           | T   | exonic        | DLX2          | ns SNV                    |
|           |           |           |           |            |            |            |            | X          |            |            | chr3  | 11,059,013  | 11,059,013  | C           | A   | exonic        | SLC6A1        | ns SNV                    |



|  |  |  |  |  |  |  |  |   |   |   |       |            |            |                          |        |          |         |              |
|--|--|--|--|--|--|--|--|---|---|---|-------|------------|------------|--------------------------|--------|----------|---------|--------------|
|  |  |  |  |  |  |  |  | X |   |   | chr3  | 48,696,834 | 48,696,834 | C                        | A      | exonic   | CELSR3  | ns SNV       |
|  |  |  |  |  |  |  |  | X |   |   | chr16 | 10,989,535 | 10,989,554 | CAGACACCATCA<br>ACTGCGAC | -      | exonic   | CIITA   | fs deletion  |
|  |  |  |  |  |  |  |  | X |   |   | chr21 | 46,945,842 | 46,945,842 | C                        | G      | exonic   | SLC19A1 | ns SNV       |
|  |  |  |  |  |  |  |  | X |   |   | chr6  | 29,910,754 | 29,910,761 | CCGAGTGG                 | -      | exonic   | HLA-A   | fs deletion  |
|  |  |  |  |  |  |  |  |   | X |   | chr3  | 40,464,893 | 40,464,893 | G                        | A      | splicing | ENTPD3  | -            |
|  |  |  |  |  |  |  |  |   | X |   | chr12 | 7,288,877  | 7,288,877  | G                        | C      | exonic   | CLSTN3  | ns SNV       |
|  |  |  |  |  |  |  |  |   | X |   | chr16 | 10,989,545 | 10,989,545 | -                        | A<br>A | exonic   | CIITA   | fs insertion |
|  |  |  |  |  |  |  |  |   | X |   | chr19 | 13,934,185 | 13,934,185 | C                        | T      | exonic   | ZSWIM4  | ns SNV       |
|  |  |  |  |  |  |  |  |   | X |   | chr4  | 88,535,868 | 88,535,868 | A                        | G      | exonic   | DSPP    | ns SNV       |
|  |  |  |  |  |  |  |  |   | X |   | chr6  | 29,910,758 | 29,910,759 | GT                       | -      | exonic   | HLA-A   | fs deletion  |
|  |  |  |  |  |  |  |  |   |   | X | chr4  | 73,003,798 | 73,003,798 | G                        | C      | exonic   | NPFFR2  | ns SNV       |
|  |  |  |  |  |  |  |  |   |   | X | chr12 | 6,675,434  | 6,675,434  | C                        | T      | exonic   | NOP2    | ns SNV       |
|  |  |  |  |  |  |  |  |   |   | X | chr6  | 31,324,500 | 31,324,507 | CGCAGGCT                 | -      | exonic   | HLA-B   | fs deletion  |

<sup>a</sup> fs means frameshift

<sup>b</sup> ns means non synonymous

**Table S6. Primer Information.**

| PCR primer oligo name   | PCR primer oligo sequence |
|-------------------------|---------------------------|
| 1383D2-HLA-A-be-ex1-fwd | TTGGGGATTCCCCAACTCC       |
| HLA-A-in7-rev           | GTCCACTGTTCCGCCCAA        |
| HLA-A24:02-ex2-fwd      | CTCCCACTCCATGAGGTATTTCTC  |
| HLA-A24:02-ex3-rev      | CCCTCCAGGTAGGCTCTCT       |
| 1383D2-HLA-B-be-ex1-fwd | CAGGATACTCGTGACGCGT       |
| 1383D2-HLA-B-in7-rev    | ACACACGCGAAACATCCCAA      |
| B52-ex2-fwd             | CATGAGGTATTTCTACACCGCCA   |
| 0706HLA-B-in-rev        | CTGGTACCCGCGCGCTG         |
| 604B1-HLA-C-be-ex1-fwd  | CAATCAGCGTCTCCGCAGT       |
| 604B1-HLA-C-ex8-rev     | ATGCTAACAGGAACGCAGACA     |
| HLA-C-ex1-fwd           | TCCTGCTGCTCTCGGGAG        |
| CIITA-Fwd               | GCTTGCTGTAGAGACGGCAAT     |
| CIITA-Rev               | TTGCTCCGCATCCCCCTT        |
| M13 forward primer      | GTAAAACGACGGCCAG          |
| M13 reverse primer      | CAGGAAACAGCTATGAC         |

**Data S1. On/off-target candidate of HLA-A/B guideRNA.**

**Data S2. On/off-target candidate of CIITA guideRNA.**

**Data S3. Statistical analysis.**
